# Supplementary material
Source: PubMed Central journal article supplement (PMC3295089)

**Supplementary figure.** Distribution of MICs of antimicrobial agents in ST81<sup>6A</sup>, ST282<sup>6D</sup>, and ST3171<sup>6D</sup> isolates.

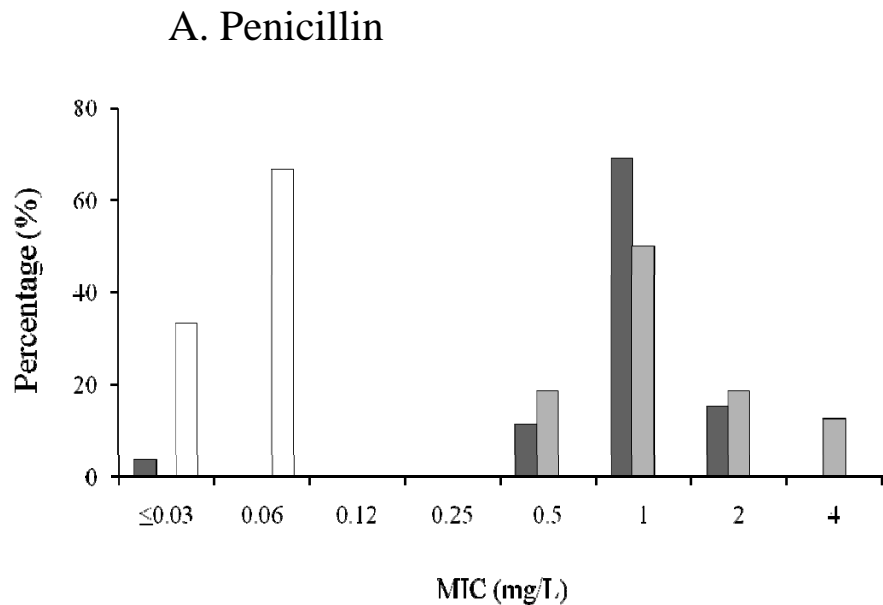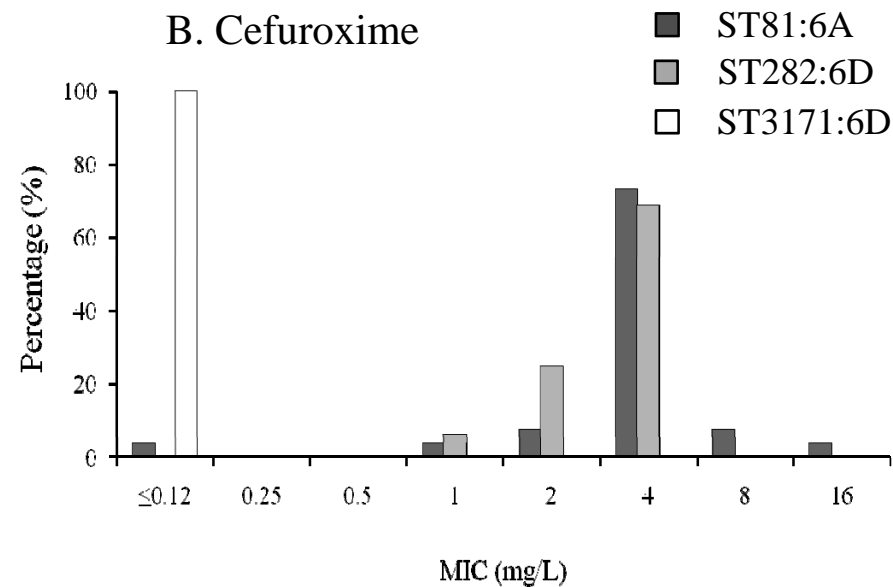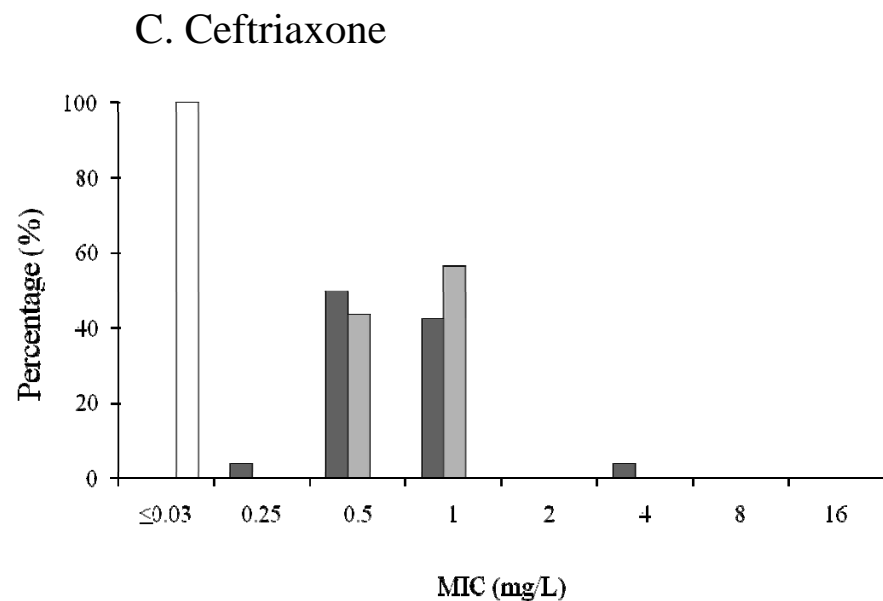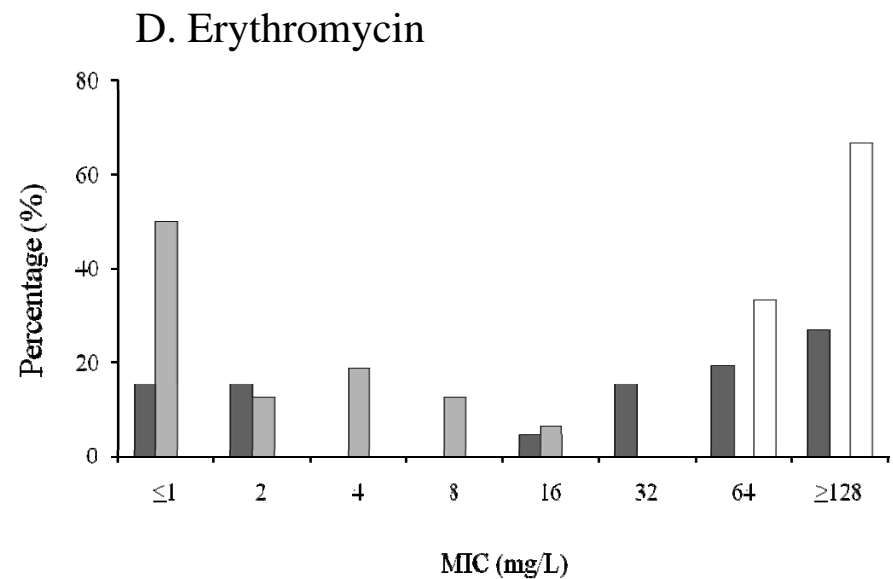

### E. Clarithromycin

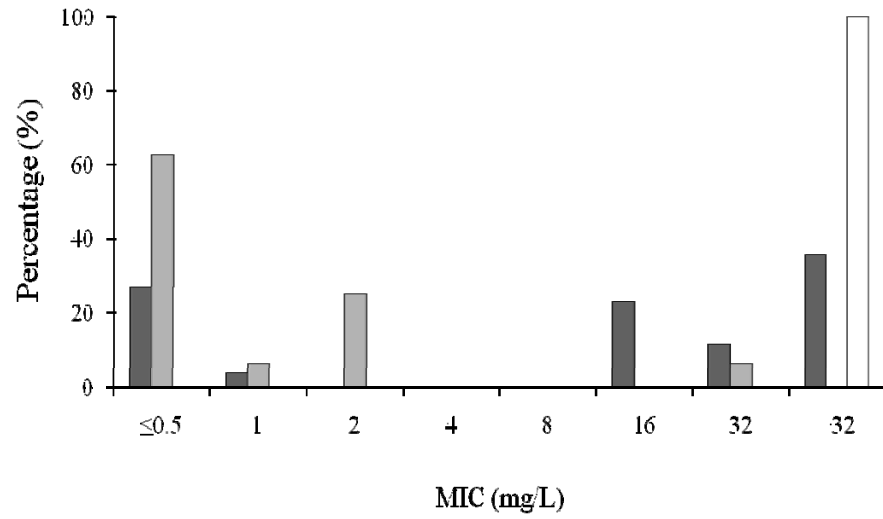

### F. Trimethoprim/sulfamethoxazole

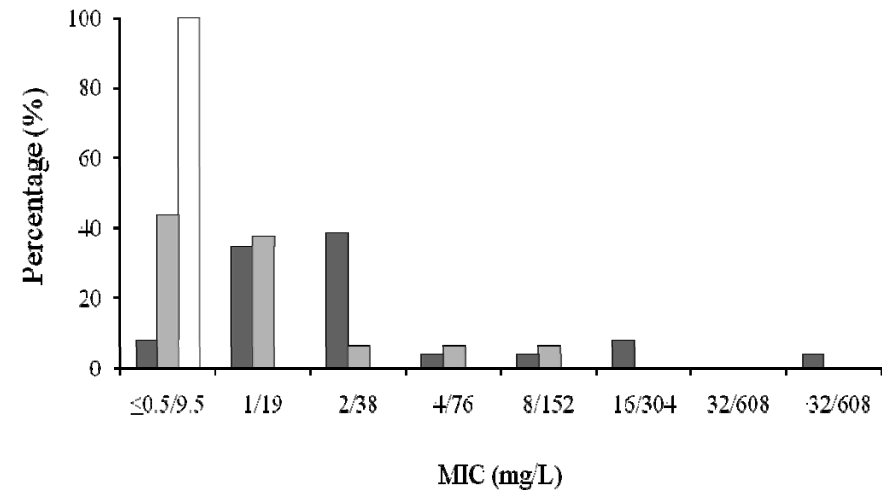

Supplement: supp_50.3.818_JCM-JCM05895-11-s01.pdf [file supp_50.3.818_JCM-JCM05895-11-s01.pdf]
